# Supplementary material for: The GTPase Arf1 Is a Determinant of Yeast Vps13 Localization to the Golgi Apparatus
Source: Int J Mol Sci. 2021 Nov 12;22(22):12274. doi: 10.3390/ijms222212274 (PMC8619211; doi:10.3390/ijms222212274)
Supplement: Supplementary file 1 [file ijms-22-12274-s001.zip › ijms-1440214-supplementary.pdf]

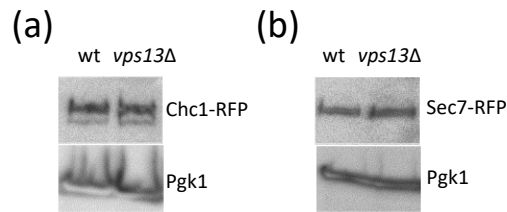

**Figure S1.** The levels of Chc1-RFP and Sec7-RFP are not changed in *vps13Δ* mutant. **(a)** The level of Chc1-RFP from protein extracts from the wild type and *vps13Δ* mutant cells was analysed by Western blotting with anti RFP antibodies. **(b)** The level of Sec7-RFP in protein extracts from the wild type and *vps13Δ* mutant cells transformed with plasmid encoding Sec7-RFP was analysed by Western blotting with anti RFP antibodies. The level of Pgk1 was determined as a control.

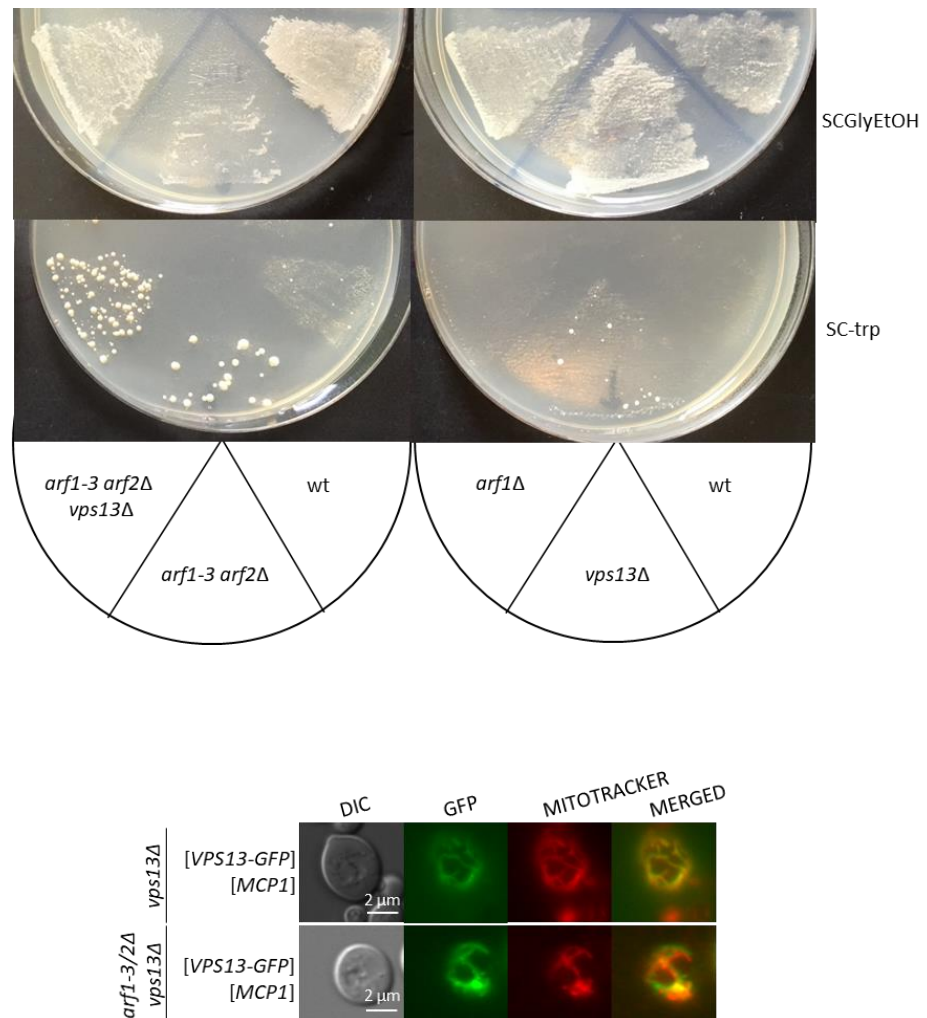

**Figure S2.** **(a)** *arf1-3 arf2Δ* and *vps13Δ* show additive effects on the rate of mtDNA escape. The strains AJT5, AJT7, AJT9, AJT11 and AJT13 were grown on SCGlyEtOH at 30 °C for 2 days and then replica-plated on to SC-trp and incubated for 5 days at 30 °C. **(b)** The Arf1 and Arf2 proteins are not necessary for Vps13 recruitment to mitochondrial membranes when *MCP1* is overexpressed. Fluorescence microscopy images of the *vps13Δ* and *arf1-3 arf2Δ vps13Δ* cells transformed with plasmids encoding Vps13-GFP and Mcp1. Transformants were grown in synthetic complete media (SC)-leu-ura and shifted to SCGly-leu-ura and incubated at 35 °C for 4 h. Mitochondria were visualized with MitoTracker and morphology of the cells was visualized by DIC microscopy.

**Table S1.** The strains used in this study.

| Strain                 | Genotype                                                                           | Reference                           |
|------------------------|------------------------------------------------------------------------------------|-------------------------------------|
| BY4741                 | MATa <i>his3Δ1 leu2Δ0 met15Δ0 ura3Δ0</i>                                           | Open Biosystems, Lafayette, CO, USA |
| <i>vps13Δ</i>          | BY4741 <i>vps13Δ::KanMX</i>                                                        | Open Biosystems                     |
| <i>vps13Δ::natMX</i>   | BY4741 <i>vps13Δ::natMX</i>                                                        | This work                           |
| <i>arf1Δ</i>           | BY4741 <i>arf1Δ::natMX</i>                                                         | This work                           |
| WR14                   | BY4741 <i>MET15</i>                                                                | This work                           |
| WR15                   | BY4741 <i>vps13Δ::KanMX MET15</i>                                                  | This work                           |
| RT364                  | MATα <i>his3-Δ200 leu2-3,112 lys2-801 ura3-52 arf1-3 arf2Δ::LEU2</i>               | [54]                                |
| DKARF1                 | MATα <i>his3-Δ200 leu2-3,112 lys2-801 ura3-52 arf1-3 arf2Δ::LEU2 vps13Δ::natMX</i> | This work                           |
| CHC1-RFP               | MATa <i>his3Δ1 leu2Δ0 met15Δ0 ura3Δ0 CHC1-RFP::KanMX</i>                           | [80]                                |
| <i>vps13Δ CHC1-RFP</i> | MATa <i>his3Δ1 leu2Δ0 met15Δ0 ura3Δ0 CHC1-RFP::KanMX vps13Δ::URA3</i>              | This work                           |
| PTY44                  | MATa <i>ura3-52 lys2 leu2-3,112 trp1Δ1</i>                                         | [81]                                |
| JC8/55                 | MATa <i>leu2 can1 kar1-1 rho0</i>                                                  | [82]                                |
| DFS160                 | MATα <i>ade2-101 leu2 ura3-52 arg8Δ::URA3 kar1-1 rho0</i>                          | [83]                                |
| AJT5                   | BY4741 <i>trp1Δ-loxP-kanMX-loxP [rho+, TRP1]</i>                                   | This work                           |
| AJT7                   | MATa <i>arf1-3 arf2- trp1Δ-loxP-kanMX-loxP [rho+, TRP1]</i>                        | This work                           |
| AJT9                   | MATa <i>arf1-3 arf2- vps13Δ::natMX trp1Δ-loxP-kanMX-loxP [rho+, TRP1]</i>          | This work                           |
| AJT11                  | BY4741 <i>arf1Δ::natMX trp1Δ-loxP-kanMX-loxP [rho+, TRP1]</i>                      | This work                           |
| AJT13                  | BY4741 <i>vps13Δ::natMX trp1Δ-loxP-kanMX-loxP [rho+, TRP1]</i>                     | This work                           |

**Table S2.** The plasmids used in this study.

| Plasmid                 | Reference                                                      |
|-------------------------|----------------------------------------------------------------|
| pBluescript SKII        | Agilent Technologies, Santa Clara, CA, USA                     |
| pUG35-VPS13             | pUG35-VPS13-yEGFP3 [20]-                                       |
| mt-RFP                  | pRS415-mt-RFP [55]                                             |
| pRS416-P <sub>GPD</sub> | pRS416-P <sub>GPD</sub> [86]                                   |
| MCP1                    | pRS416-P <sub>GPD</sub> -MCP1 This work                        |
| VPS13-GFP               | p415-P <sub>TEF1</sub> -VPS13-GFP [20]                         |
| VPS13ΔPH-GFP            | p415-P <sub>GPD1</sub> -VPS13ΔPH-GFP This work                 |
| SEC7-RFP                | pRS416-SEC7-mRFP [88]                                          |
| VPS13                   | pRS415-VPS13 [20]                                              |
| VPS13A                  | p415-P <sub>TEF1</sub> -VPS13A [20]                            |
| pKF463                  | P <sub>lac</sub> -GST•tag-Thrombin_c.s.-TEV_c.s.-2×STOP [87]   |
| GST-yPH                 | pKF463-vps13-yPH(G3036-L3144) This work                        |
| GST-hPH                 | pKF463-VPS13A-hPH(G3058-L3174) This work                       |
| yPH-GFP                 | pRS415-P <sub>TEF1</sub> -vps13-yPH(G3036-L3144)-GFP This work |
